# Supplementary material for: Enhanced recognition of a nitrogen containing organic compound by adjusting the acidity of the porous organic frameworks base (JUC-Z2)
Source: Royal Society of Chemistry journal article supplement (doi:10.1039/c4ta05640j), 2014-12-08
Supplement: c4ta05640j1.pdf [file c4ta05640j1.pdf]

[Supporting Information]

## Enhanced recognition of nitrogen-containing organic compound by adjusting acidity of porous organic frameworks base (JUC-Z2)

*Shixian Xu,<sup>1</sup> Soumyajit Roy,<sup>3</sup> Teng Ben,<sup>2\*</sup> Cuiying Pei,<sup>1</sup> and Shilun Qiu<sup>1\*</sup>*

<sup>1</sup> State Key Laboratory of Inorganic Synthesis and Preparative Chemistry, Jilin University, Changchun, China; <sup>2</sup> Department of Chemistry, Jilin University, Changchun, China. <sup>3</sup> *EFAML, Materials Science Center, Department of Chemical Sciences, IISER-Kolkata, Mohanpur 741252, India*

E-mail: [sqiu@jlu.edu.cn](mailto:sqiu@jlu.edu.cn); [tben@jlu.edu.cn](mailto:tben@jlu.edu.cn)

## Table of Contents

|                                                                                                               |     |
|---------------------------------------------------------------------------------------------------------------|-----|
| <b>1. Determination of degree of sulfonation</b>                                                              | S3  |
| <b>2. Binding of host solid JUC-Z2-SO<sub>3</sub>H with ethylenediamine guest in different solvent</b>        | S4  |
| <b>3. Binding of host solid JUC-Z2-SO<sub>3</sub>H with n-butylamine guest in different solvent</b>           | S6  |
| <b>4. Binding of host solid JUC-Z2-SO<sub>3</sub>H with dipropylamine guest in different solvent</b>          | S7  |
| <b>5. Binding of host solid JUC-Z2-SO<sub>3</sub>H with tributylamine guest in different solvent</b>          | S9  |
| <b>6. Binding of host solid JUC-Z2-SO<sub>3</sub>H with aniline guest in different solvent</b>                | S10 |
| <b>7. Binding of host solid JUC-Z2-SO<sub>3</sub>H with N,N-Dimethylformamide guest in different solvent</b>  | S12 |
| <b>8. Binding of host solid JUC-Z2-SO<sub>3</sub>H with N- methyl pyrrolidone guests in different solvent</b> | S13 |
| <b>9. Binding of host solid JUC-Z2 with ethylenediamine guest in different solvent.</b>                       | S15 |
| <b>10. Binding of host solid JUC-Z2 with n-butylamine guest in different solvent</b>                          | S16 |
| <b>11. Binding of host solid JUC-Z2 with dipropylamine guest in different solvent</b>                         | S18 |
| <b>12. Binding of host solid JUC-Z2 with tributylamine guest in different solvent</b>                         | S19 |
| <b>13. Binding of host solid JUC-Z2 with aniline guest in different solvent</b>                               | S21 |
| <b>14. Binding of host solid JUC-Z2 with N, N-Dimethylformamide guest in different solvent</b>                | S22 |
| <b>15. Binding of host solid JUC-Z2 with N- methyl pyrrolidone guest in different solvent</b>                 | S24 |

## 1. Determination of degree of sulfonation

(1) Preparation and calibration of sodium hydroxide solution:

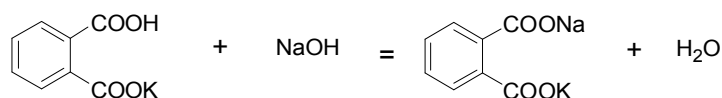

$$C_{\text{NaOH}} = \frac{m_{\text{KHC}_8\text{H}_4\text{O}_4} \times 1000}{M_{\text{KHC}_8\text{H}_4\text{O}_4} \times V_{\text{NaOH}}} \quad (M_{\text{KHC}_8\text{H}_4\text{O}_4} = 204.2 \text{ g mol}^{-1}) \quad (1)$$

**Table S1.** Calibration of sodium hydroxide solution      Indicator: phenolphthalein

|                                                   | 1      | 2      | 3      |
|---------------------------------------------------|--------|--------|--------|
| $m_{\text{KHC}_8\text{H}_4\text{O}_4} / \text{g}$ | 2.9912 | 3.1448 | 2.9888 |
| $V_{\text{NaOH}} / \text{mL}$                     | 14.43  | 15.17  | 14.40  |
| $C_{\text{NaOH}} / \text{mol L}^{-1}$             | 1.0151 | 1.0158 | 1.0164 |
| $\bar{C}_{\text{NaOH}} / \text{mol L}^{-1}$       |        | 1.0158 |        |

(2) Preparation and calibration of hydrochloric acid solution:

$$C_{\text{HCl}} = \frac{C_{\text{NaOH}} \times V_{\text{NaOH}}}{V_{\text{HCl}}} \quad (2)$$

**Table S2.** Calibration of hydrochloric acid solution

|                                            | 1      | 2      | 3      |
|--------------------------------------------|--------|--------|--------|
| $V_{\text{NaOH}} / \text{mL}$              | 15.00  | 15.00  | 15.00  |
| $V_{\text{HCl}} / \text{mL}$               | 15.20  | 15.22  | 15.21  |
| $C_{\text{HCl}} / \text{mol L}^{-1}$       | 1.0024 | 1.0011 | 1.0018 |
| $\bar{C}_{\text{HCl}} / \text{mol L}^{-1}$ |        | 1.0018 |        |

(3) Determination of degree of sulfonation:

Procedure:

- 1) Polymer was grinded into powder. 0.1 g of JUC-Z2-SO<sub>3</sub>H was taken in a 100 mL flask followed by addition of 20.00 mL sodium hydroxide standard solution.
- 2) Mixing for 72 h to attain uniformity.
- 3) Using phenolphthalein as indicator, the determination of degree of sulfonation by acid-base titration.

$$H = \frac{C_1V_1 - C_2V_2}{m} \quad (3)$$

H—degree of sulfonation (mmol/g)

m—the quality of the polymer (g)

C<sub>1</sub>—the concentration of sodium hydroxide standard solution (mol/L)

V<sub>1</sub>—volume of sodium hydroxide standard solution (0.02 L)

C<sub>2</sub>—the concentration of hydrochloric acid standard solution (mol/L)

V<sub>2</sub>—volume of Hydrochloric acid standard solution (L)

**Table S3.** Determination of degree of sulfonation

|                                  | 1      | 2      | 3      |
|----------------------------------|--------|--------|--------|
| <i>m</i> / g                     | 0.1004 | 0.1010 | 0.1008 |
| <i>V</i> <sub>NaOH</sub> / mL    | 20.00  | 20.00  | 20.00  |
| <i>V</i> <sub>HCl</sub> / mL     | 19.95  | 19.98  | 19.96  |
| <i>H</i> / mmol g <sup>-1</sup>  | 3.39   | 3.08   | 3.27   |
| $\bar{H}$ / mmol g <sup>-1</sup> |        | 3.21   |        |

**2. Binding of host solid JUC-Z2-SO<sub>3</sub>H with ethylenediamine guest in different solvent.**

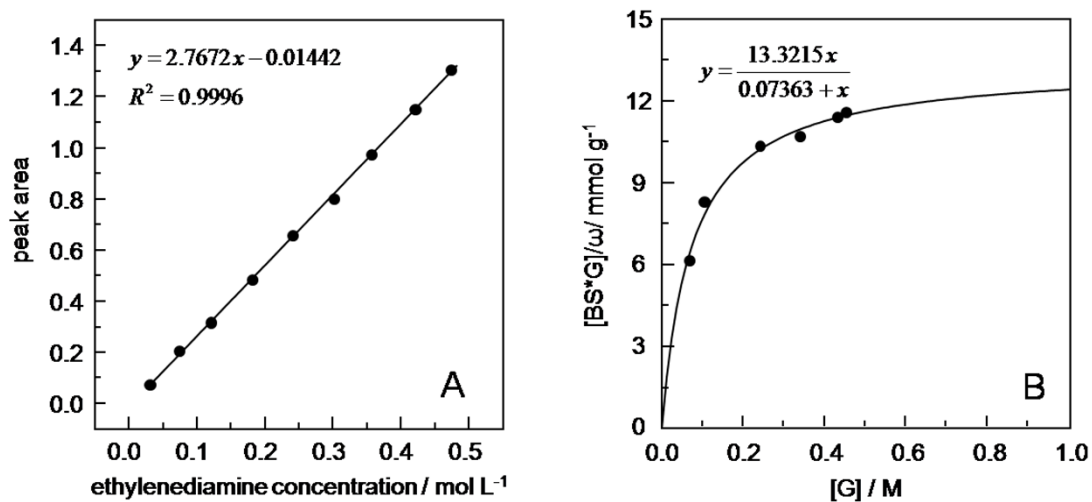

**Figure S1.** Linear curve of GC at various ethylenediamine concentration in carbon tetrachloride solvent (CCl<sub>4</sub>) (A), Binding of host solid JUC-Z2-SO<sub>3</sub>H with ethylenediamine guest (B).

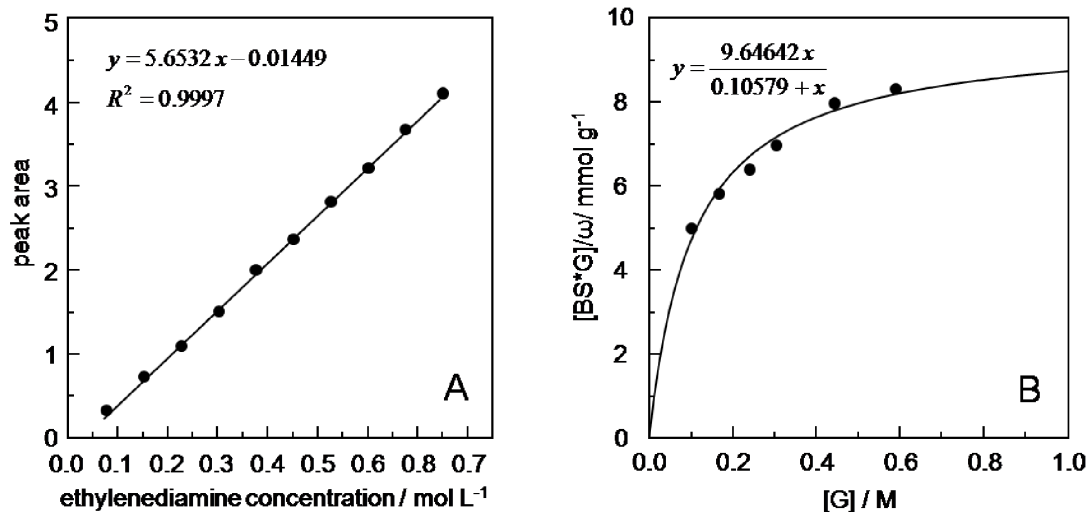

**Figure S2.** Linear curve of GC at various ethylenediamine concentration in ethanol (A), Binding of host solid JUC-Z2-SO<sub>3</sub>H with ethylenediamine guest (B).

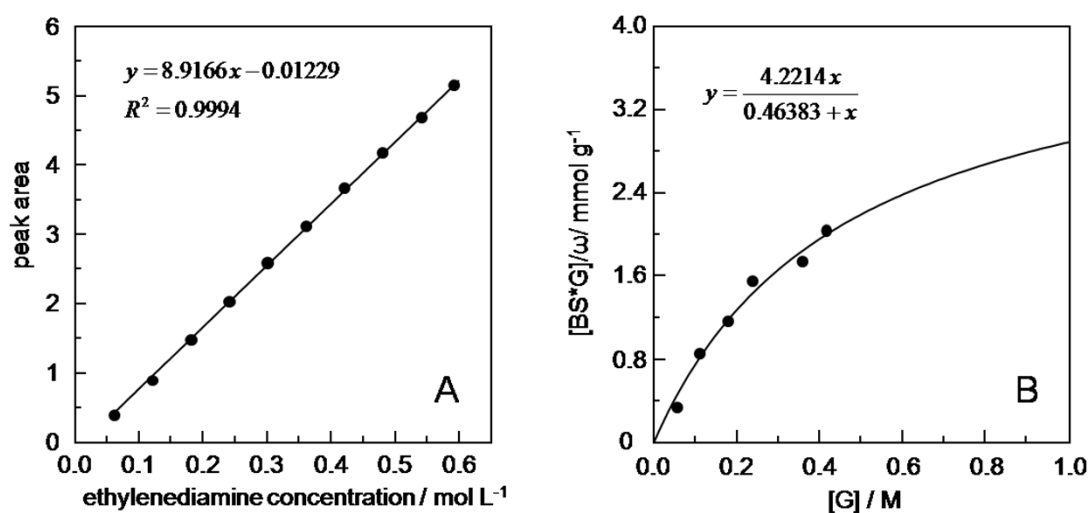

**Figure S3.** Linear curve of GC at various ethylenediamine concentration in methanol (A), Binding of host solid JUC-Z2-SO<sub>3</sub>H with ethylenediamine guest (B).

### 3. Binding of host solid JUC-Z2-SO<sub>3</sub>H with n-butylamine guest in different solvent.

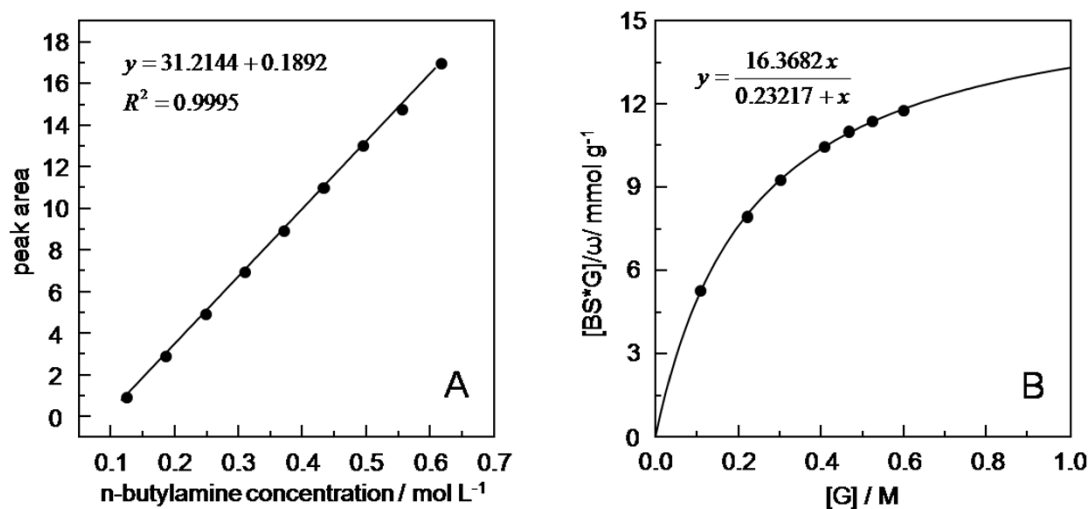

**Figure S4.** Linear curve of GC at various n-butylamine concentration in CCl<sub>4</sub> (A), Binding of host solid JUC-Z2-SO<sub>3</sub>H with n-butylamine guest (B).

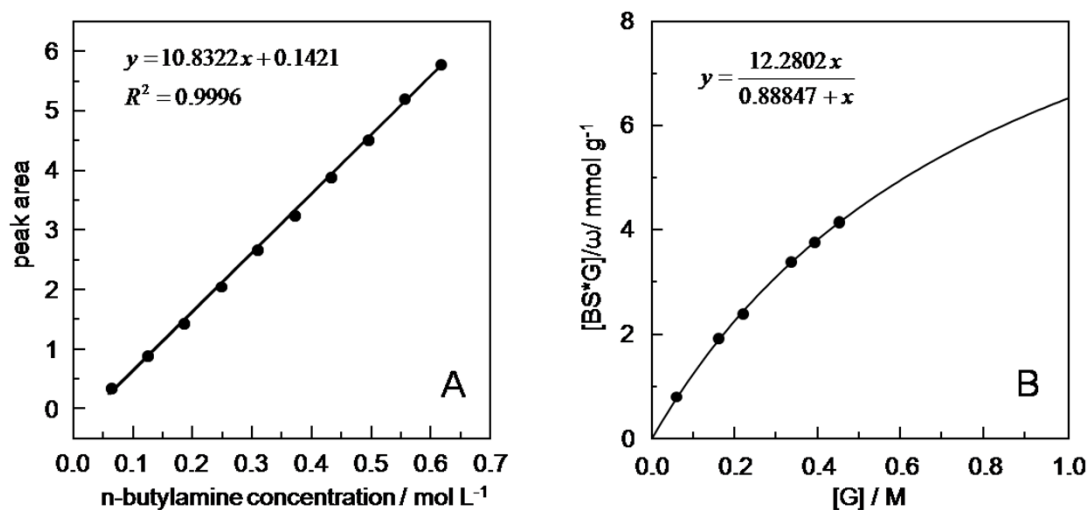

**Figure S5.** Linear curve of GC at various n-butylamine concentration in ethanol (A), Binding of host solid JUC-Z2-SO<sub>3</sub>H with n-butylamine guest (B).

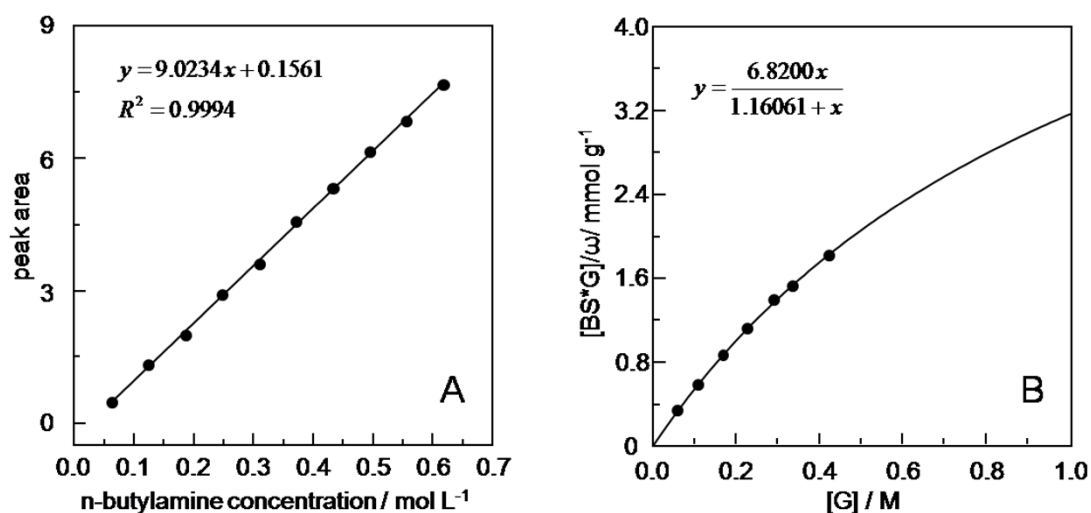

**Figure S6.** Linear curve of GC at various n-butylamine concentration in methanol (A), Binding of host solid JUC-Z2-SO<sub>3</sub>H with n-butylamine guest (B).

#### 4. Binding of host solid JUC-Z2-SO<sub>3</sub>H with dipropylamine guest in different solvent.

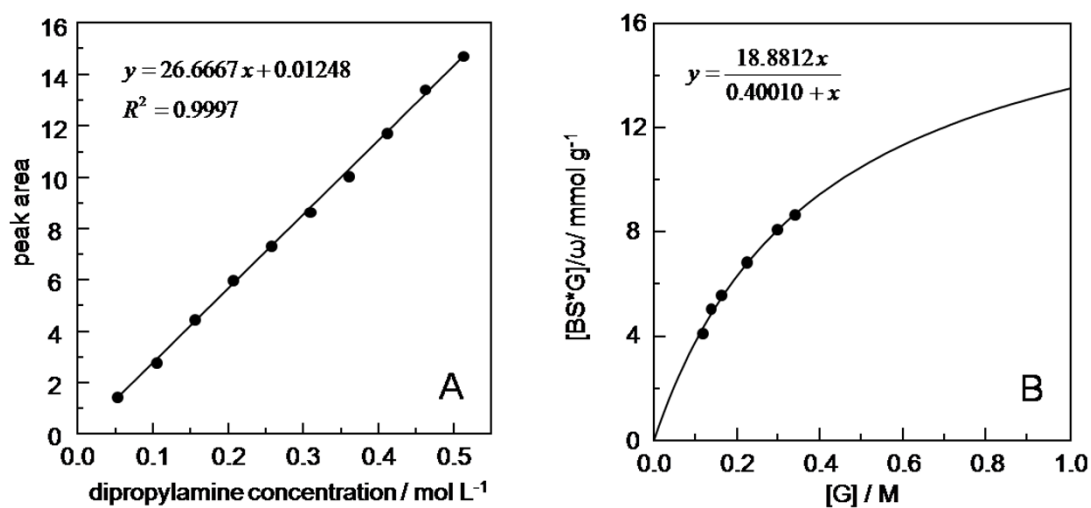

**Figure S7.** Linear curve of GC at various dipropylamine concentration in CCl<sub>4</sub> (A), Binding of host solid JUC-Z2-SO<sub>3</sub>H with dipropylamine guest (B).



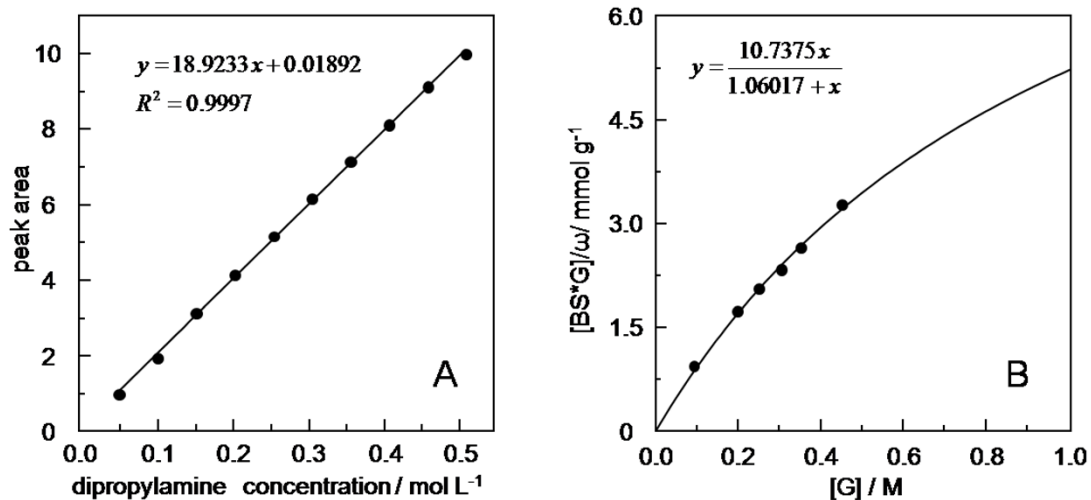

**Figure S8.** Linear curve of GC at various dipropylamine concentration in ethanol (A), Binding of host solid JUC-Z2-SO<sub>3</sub>H with dipropylamine guest (B).

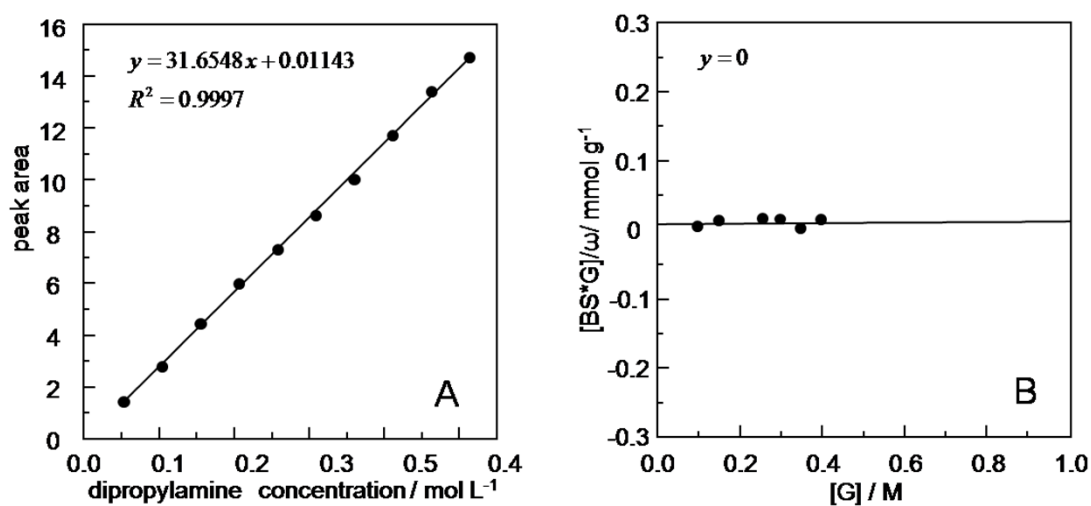

**Figure S9.** Linear curve of GC at various dipropylamine concentration in methanol (A), Binding of host solid JUC-Z2-SO<sub>3</sub>H with dipropylamine guest (B).

5. Binding of host solid JUC-Z2-SO<sub>3</sub>H with tributylamine guest in different solvent.

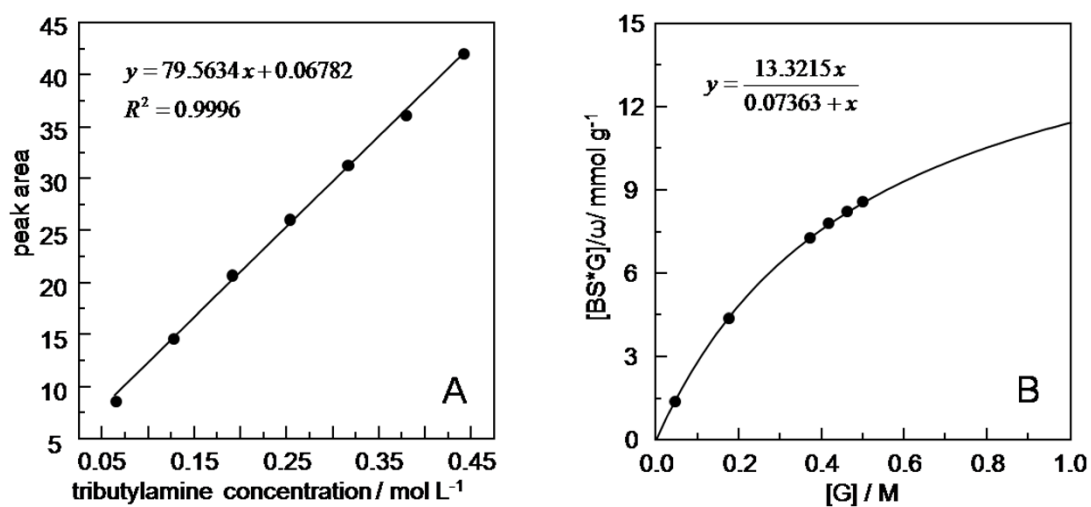

Figure S10. Linear curve of GC at various tributylamine concentration in CCl<sub>4</sub> (A), Binding of host solid JUC-Z2-SO<sub>3</sub>H with tributylamine guest (B).

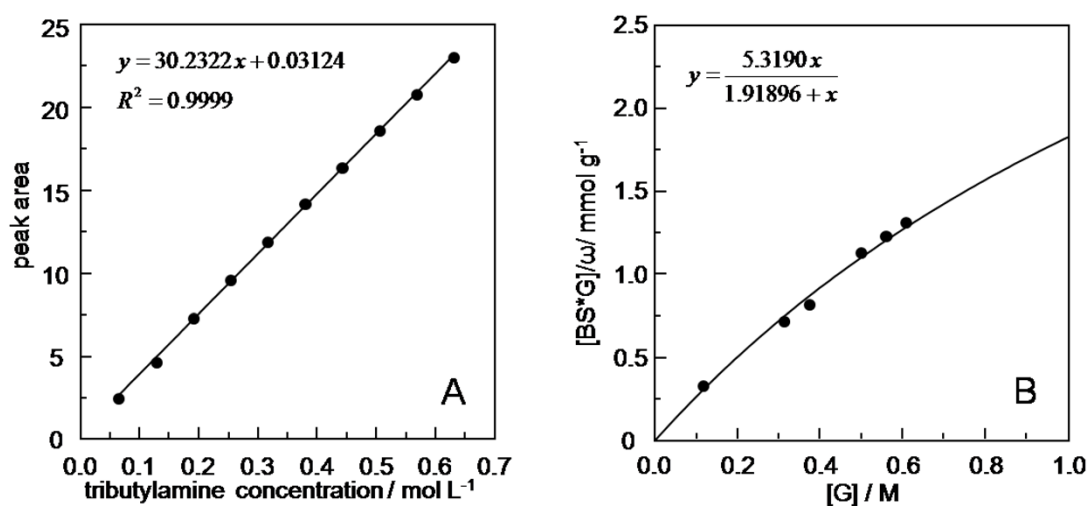

Figure S11. Linear curve of GC at various tributylamine concentration in ethanol (A), Binding of host solid JUC-Z2-SO<sub>3</sub>H with tributylamine guest (B).

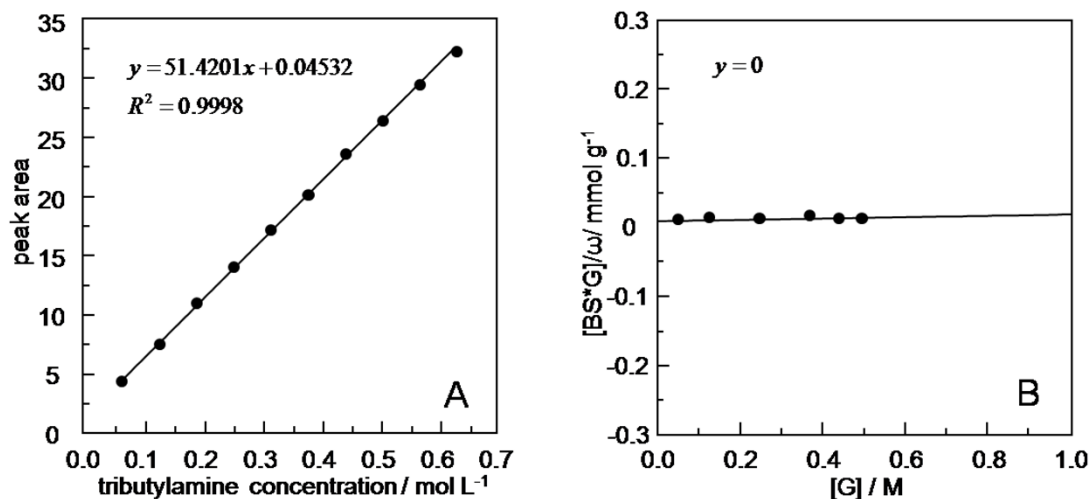

**Figure S12.** Linear curve of GC at various tributylamine concentration in methanol (A), Binding of host solid JUC-Z2-SO<sub>3</sub>H with tributylamine guest (B).

## 6. Binding of host solid JUC-Z2-SO<sub>3</sub>H with aniline guest in different solvent.

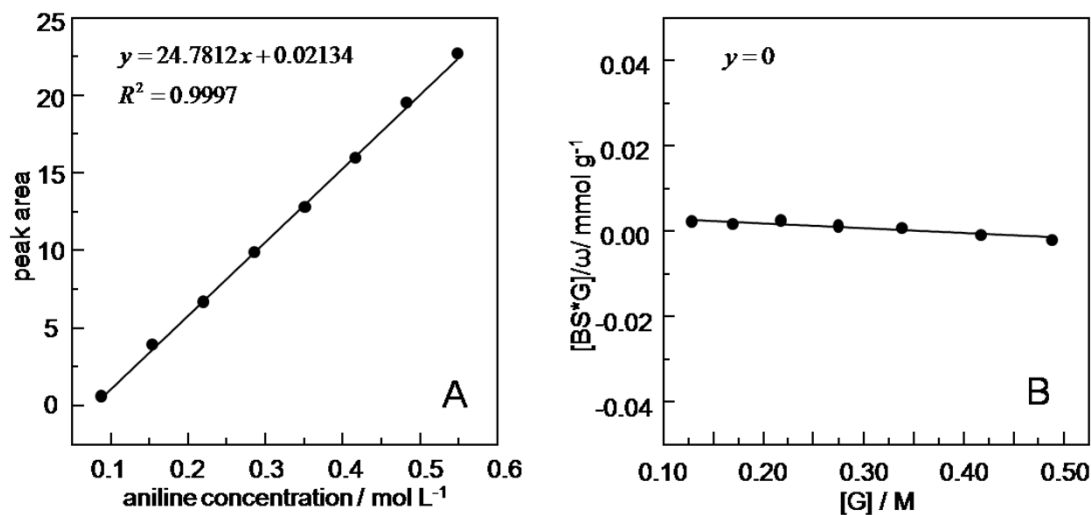

**Figure S13.** Linear curve of GC at various aniline concentration in CCl<sub>4</sub> (A), Binding of host solid JUC-Z2-SO<sub>3</sub>H with aniline guest (B).

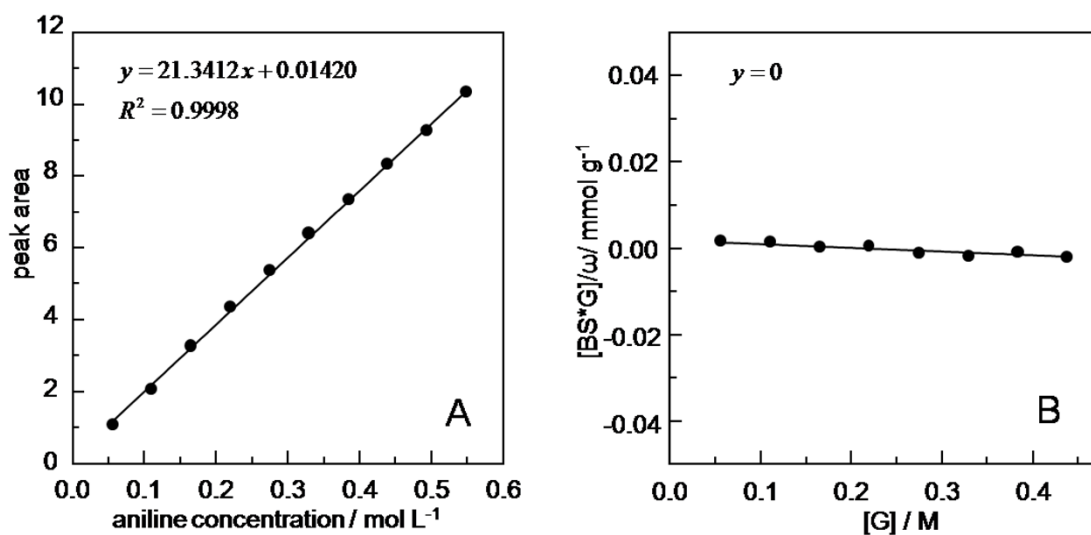

**Figure S14.** Linear curve of GC at various aniline concentration in ethanol (A), Binding of host solid JUC-Z2-SO<sub>3</sub>H with aniline guest (B).

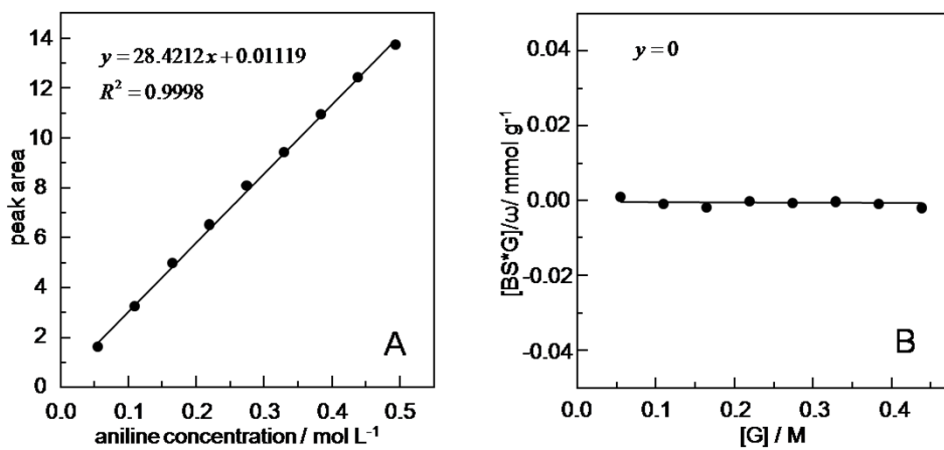

**Figure S15.** Linear curve of GC at various aniline concentration in methanol (A), Binding of host solid JUC-Z2-SO<sub>3</sub>H with aniline guest (B).

7. Binding of host solid JUC-Z2-SO<sub>3</sub>H with N,N-Dimethylformamide guest in different solvent.

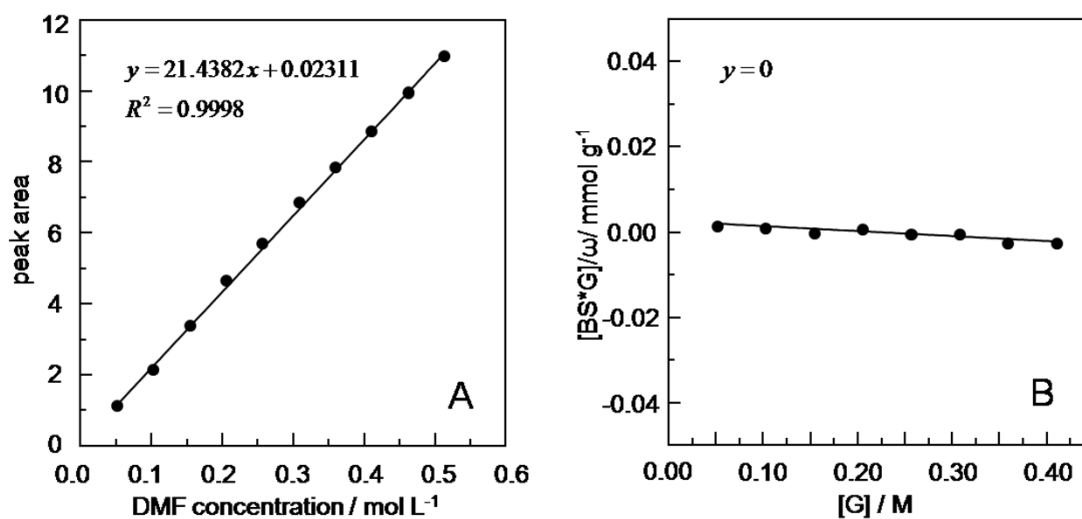

Figure S16. Linear curve of GC at various N,N-Dimethylformamide concentration in CCl<sub>4</sub> (A), Binding of host solid JUC-Z2-SO<sub>3</sub>H with N,N-Dimethylformamide guest (B).

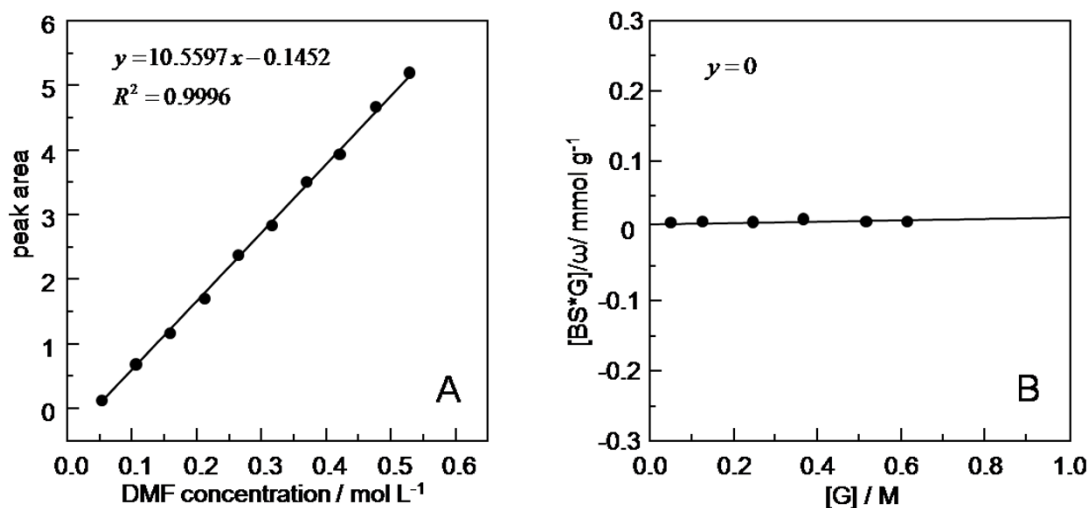

Figure S17. Linear curve of GC at various N,N-Dimethylformamide concentration in ethanol (A), Binding of host solid JUC-Z2-SO<sub>3</sub>H with N, N-Dimethylformamide guest (B).

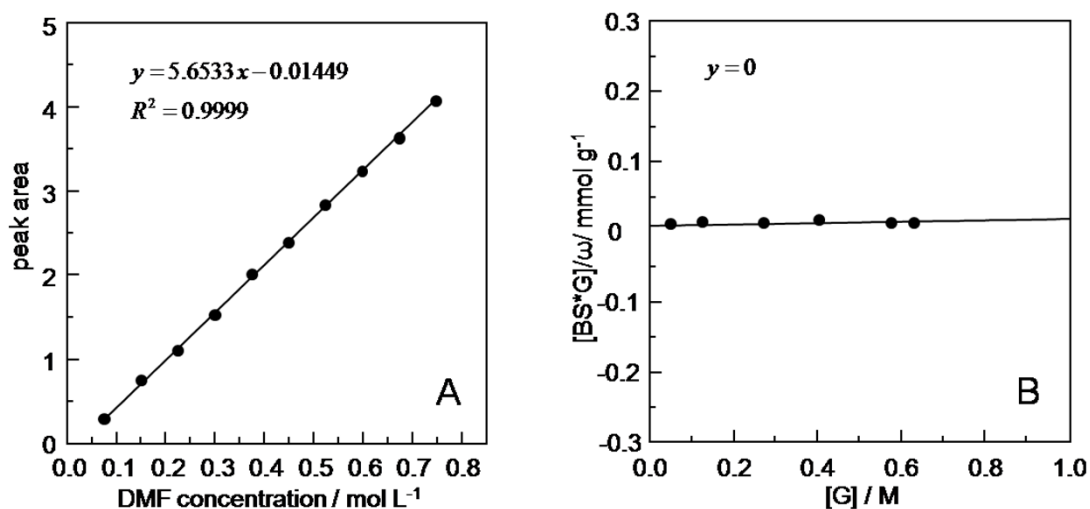

**Figure S18.** Linear curve of GC at various N,N-Dimethylformamide concentration in methanol (A), Binding of host solid JUC-Z2-SO<sub>3</sub>H with N,N-Dimethylformamide guest (B).

### 8. Binding of host solid JUC-Z2-SO<sub>3</sub>H with N- methyl pyrrolidone guest in different solvent.

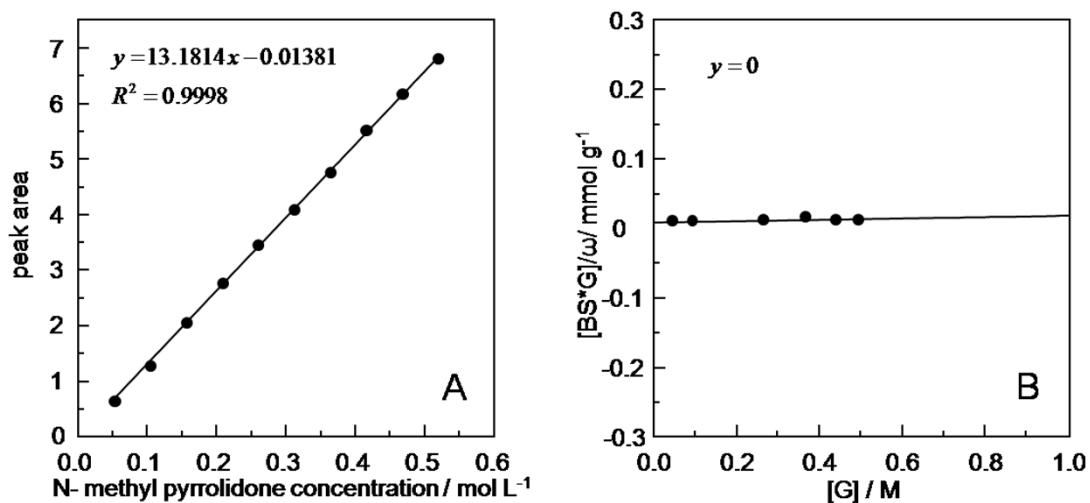

**Figure S19.** Linear curve of GC at various N- methyl pyrrolidone concentration in CCl<sub>4</sub> (A), Binding of host solid JUC-Z2-SO<sub>3</sub>H with N- methyl pyrrolidone guest (B).

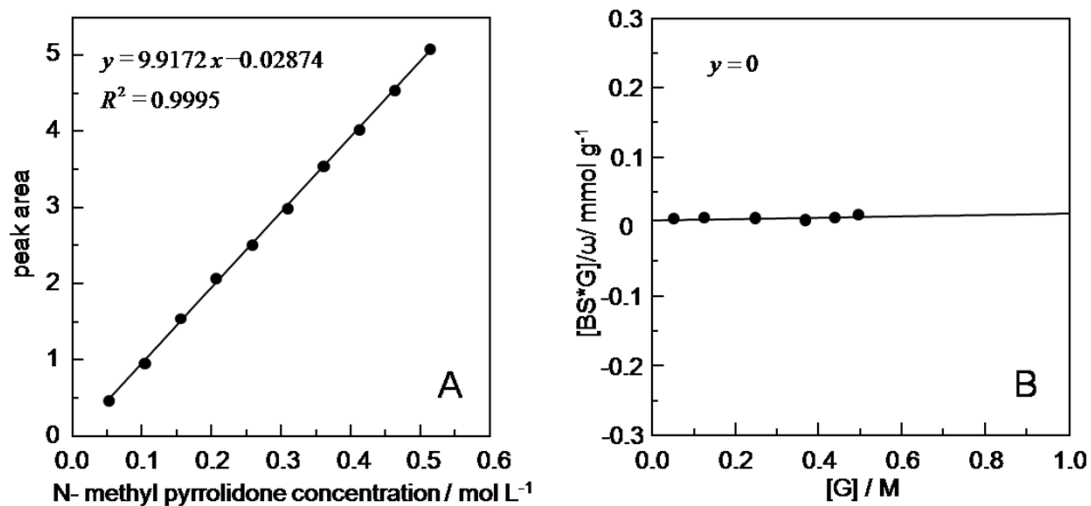

**Figure S20.** Linear curve of GC at various N- methyl pyrrolidone concentration in ethanol (A), Binding of host solid JUC-Z2-SO<sub>3</sub>H with N- methyl pyrrolidone guest (B).

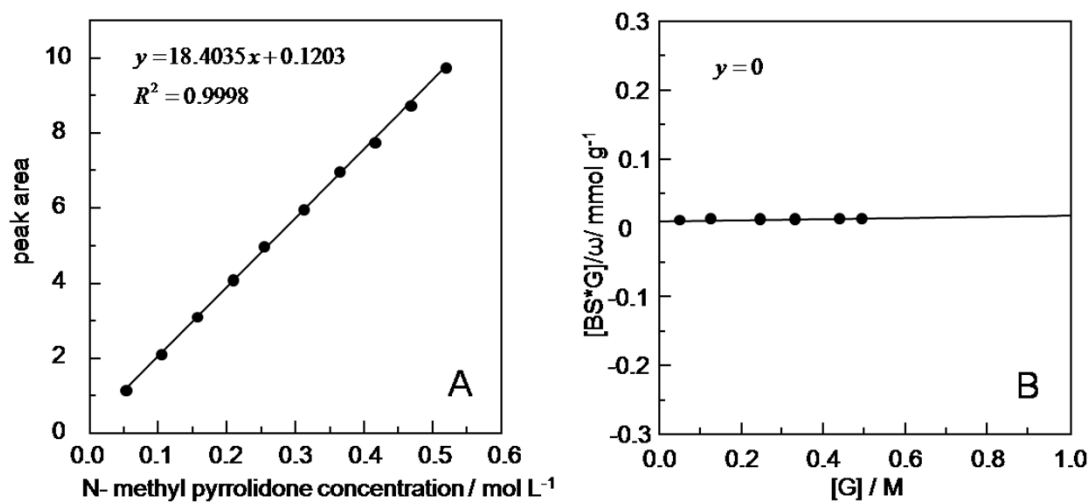

**FigureS21.** Linear curve of GC at various N- methyl pyrrolidone concentration in methanol (A), Binding of host solid JUC-Z2-SO<sub>3</sub>H with N- methyl pyrrolidone guest (B).

## 9. Binding of host solid JUC-Z2 with ethylenediamine guest in different solvent.

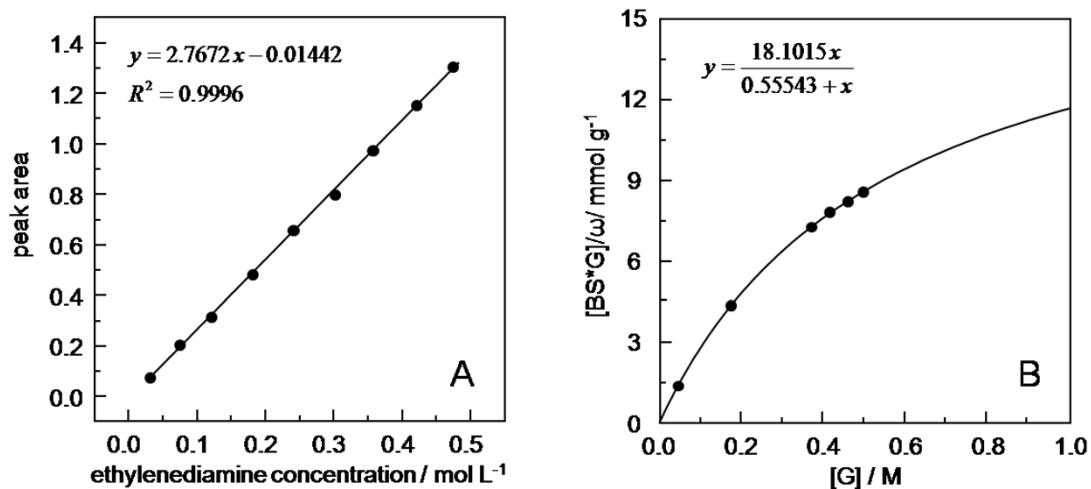

**Figure S22.** Linear curve of GC at various ethylenediamine concentration in  $\text{CCl}_4$  (A), Binding of host solid JUC-Z2 with ethylenediamine Guest (B).

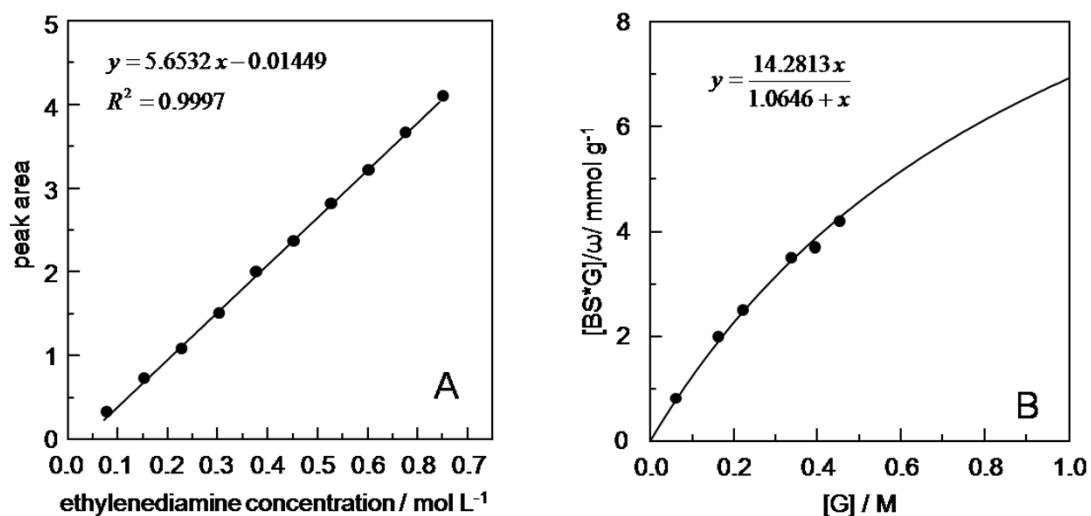

**Figure S23.** Linear curve of GC at various ethylenediamine concentration in ethanol (A), Binding of host solid JUC-Z2 with ethylenediamine Guest (B).



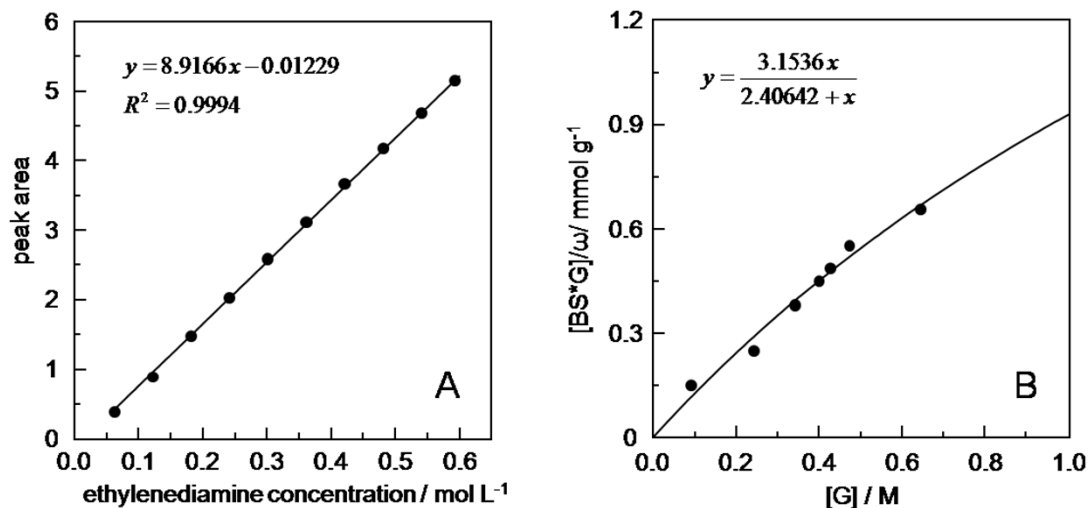

**Figure S24.** Linear curve of GC at various ethylenediamine concentration in methanol (A), Binding of host solid JUC-Z2 with ethylenediamine Guest (B).

**10. Binding of host solid JUC-Z2 with n-butylamine guest in different solvent.**

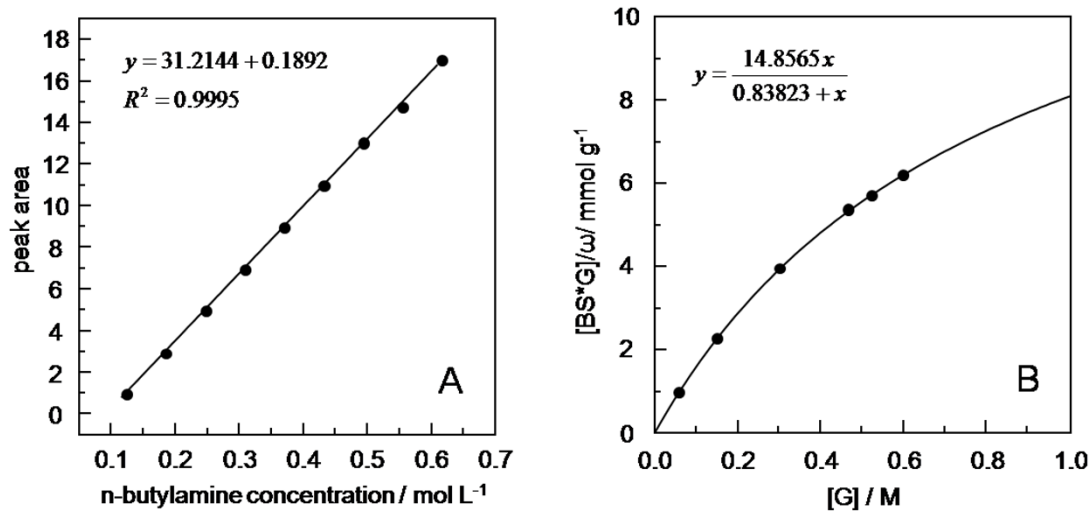

**Figure S25.** Linear curve of GC at various n-butylamine concentration in CCl<sub>4</sub> (A), Binding of host solid JUC-Z2 with n-butylamine guest (B).

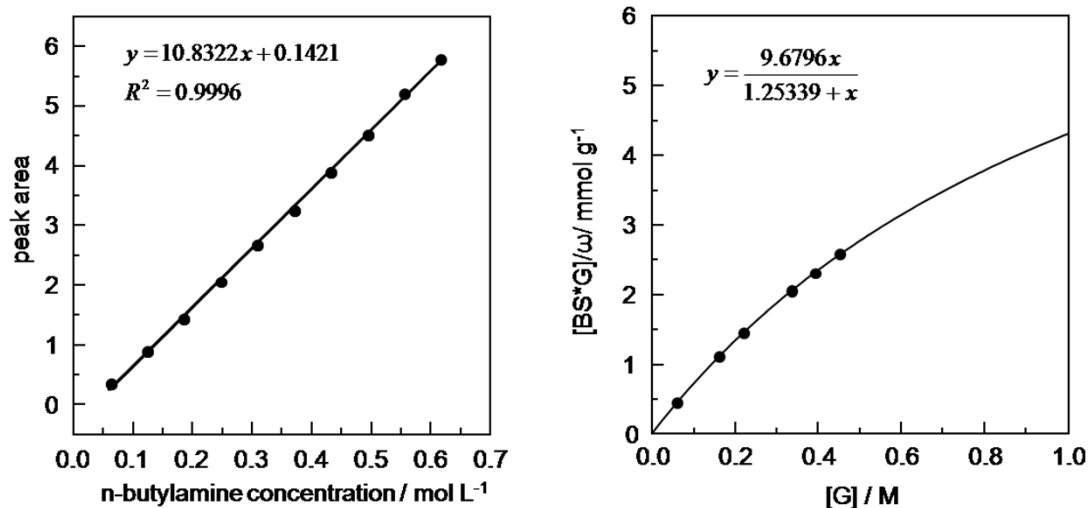

**Figure S26.** Linear curve of GC at various n-butylamine concentration in ethanol (A), Binding of host solid JUC-Z2 with n-butylamine guest (B).

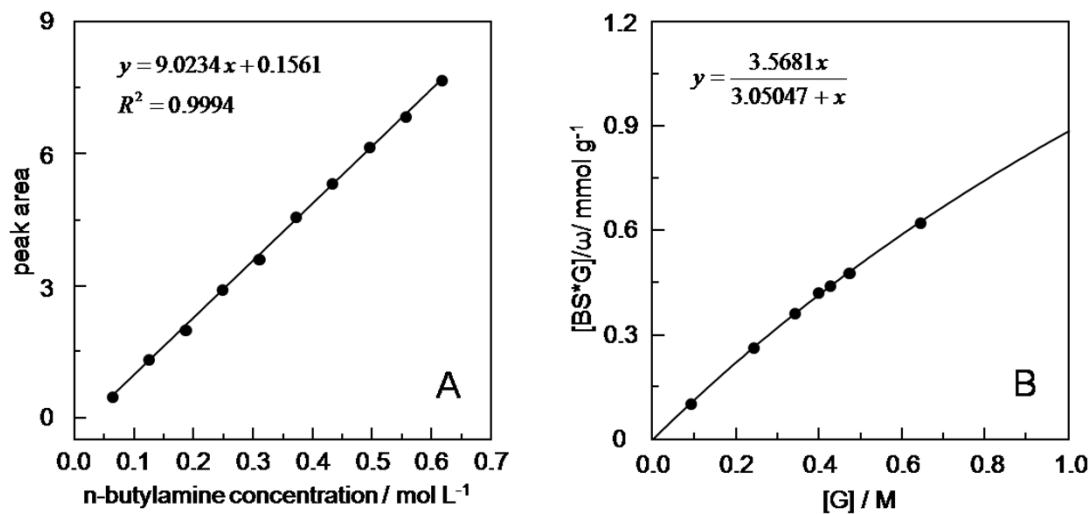

**Figure S27.** Linear curve of GC at various n-butylamine concentration in methanol (A), Binding of host solid JUC-Z2 with n-butylamine guest (B).

### 11. Binding of host solid JUC-Z2 with dipropylamine guest in different solvent.

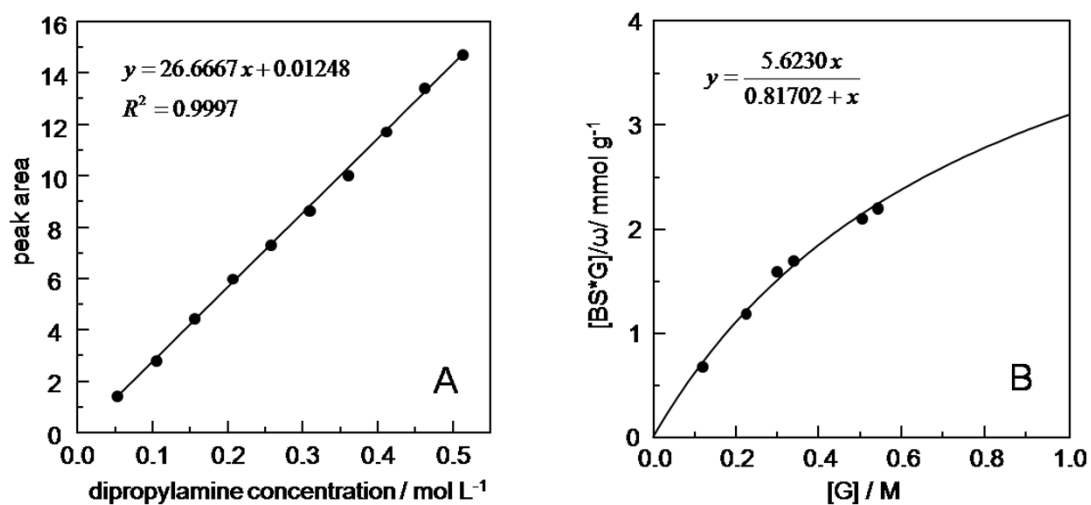

**Figure S28.** Linear curve of GC at various dipropylamine concentration in  $\text{CCl}_4$  (A), Binding of host solid JUC-Z2 with dipropylamine guest (B).

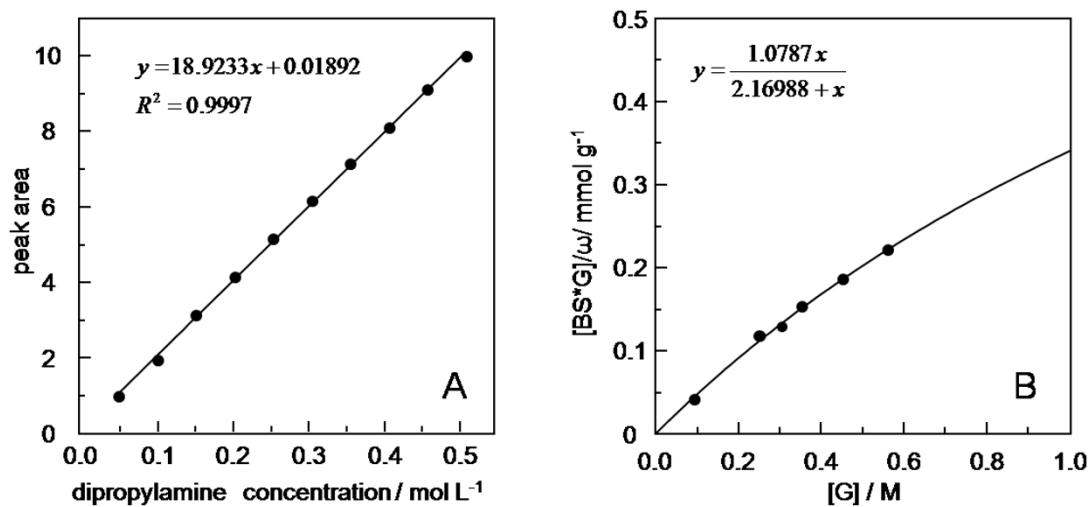

**Figure S29.** Linear curve of GC at n various dipropylamine concentration in ethanol (A), Binding of host solid JUC-Z2 with dipropylamine guest (B).

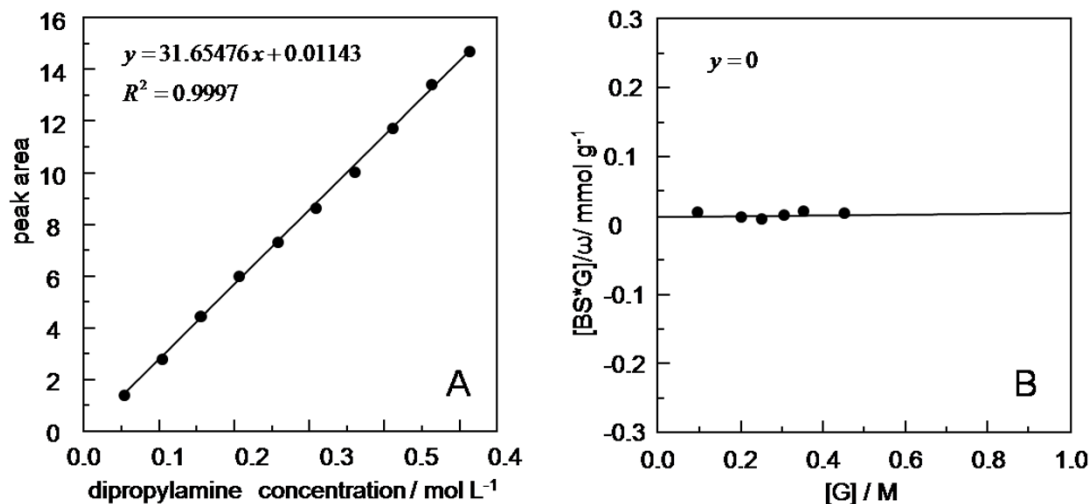

**Figure S30.** Linear curve of GC at various dipropylamine concentration in methanol (A), Binding of host solid JUC-Z2 with dipropylamine guest (B).

## 12. Binding of host solid JUC-Z2 with tributylamine guest in different solvent.

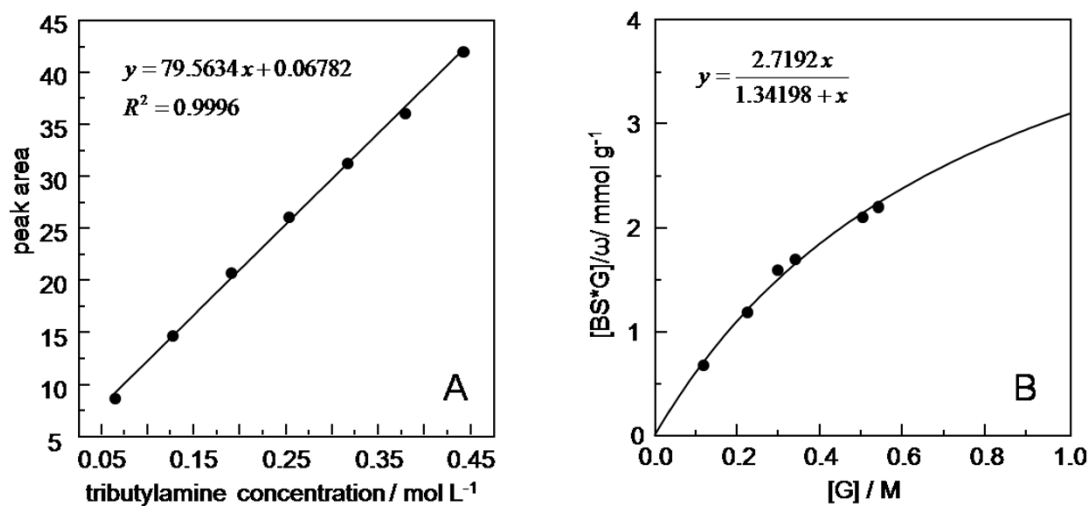

**Figure S31.** Linear curve of GC at various tributylamine concentration in CCl<sub>4</sub> (A), Binding of host solid JUC-Z2 with tributylamine guest (B).

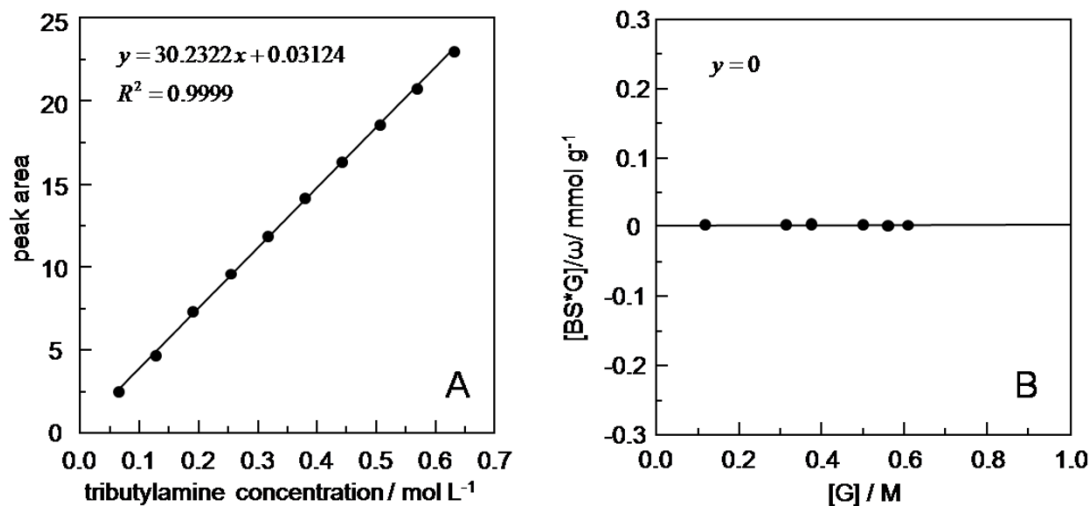

**Figure S32.** Linear curve of GC at various tributylamine concentration in ethanol (left) Binding of host solid JUC-Z2 with tributylamine guest (right).

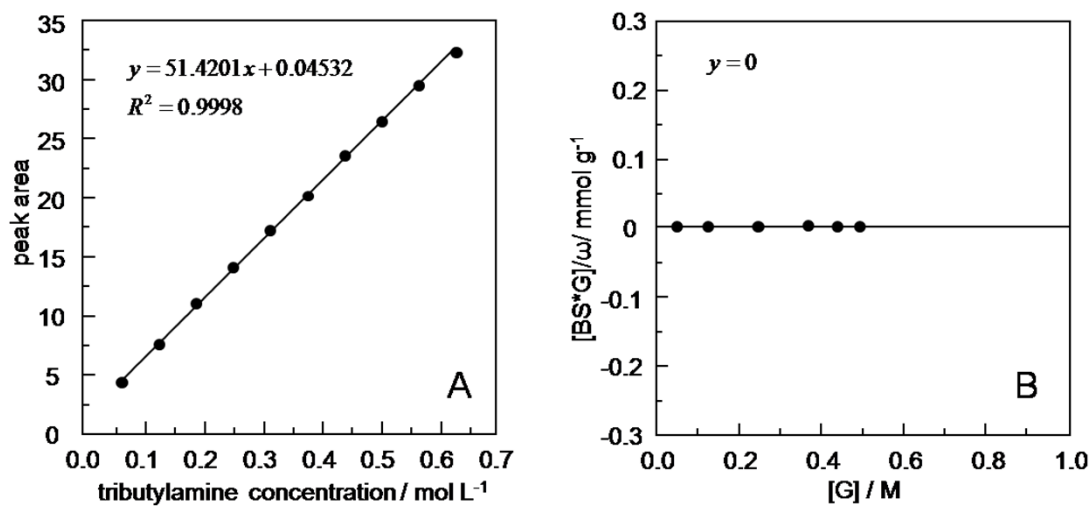

**Figure S33.** Linear curve of GC at various tributylamine concentration in methanol (A), Binding of host solid JUC-Z2 with tributylamine guest (B).

13. Binding of host solid JUC-Z2 with aniline guest in different solvent.

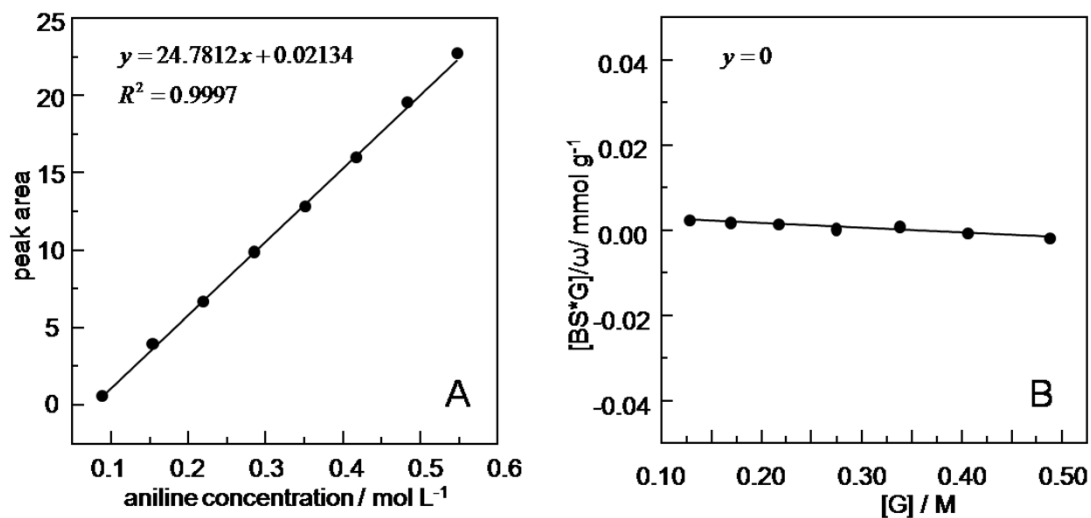

Figure S34. Linear curve of GC at various aniline concentration in  $\text{CCl}_4$  (A), Binding of host solid JUC-Z2 with aniline guest (B).

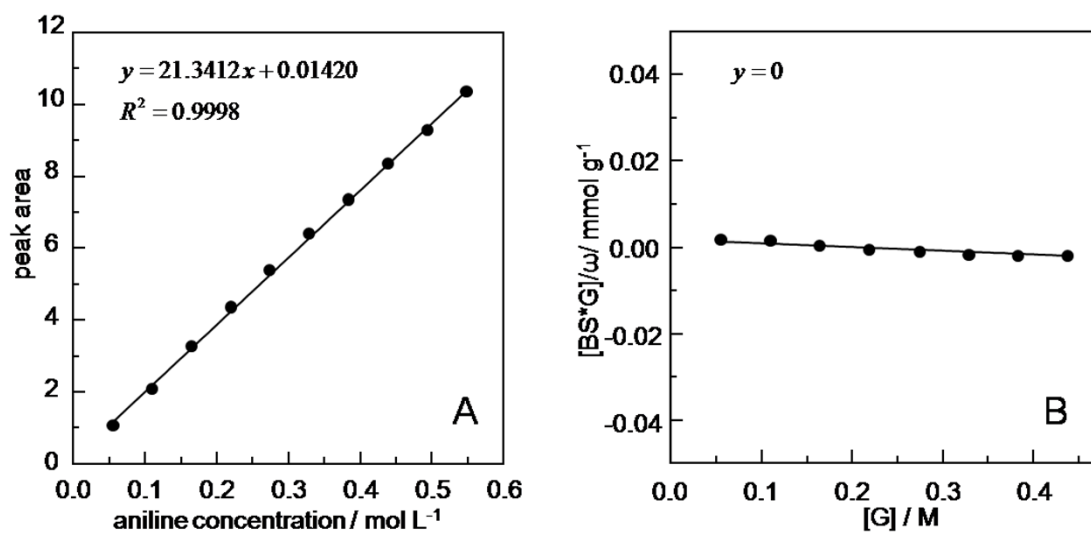

Figure S35. Linear curve of GC at various aniline concentration in ethanol (A), Binding of host solid JUC-Z2 with aniline guest (B).

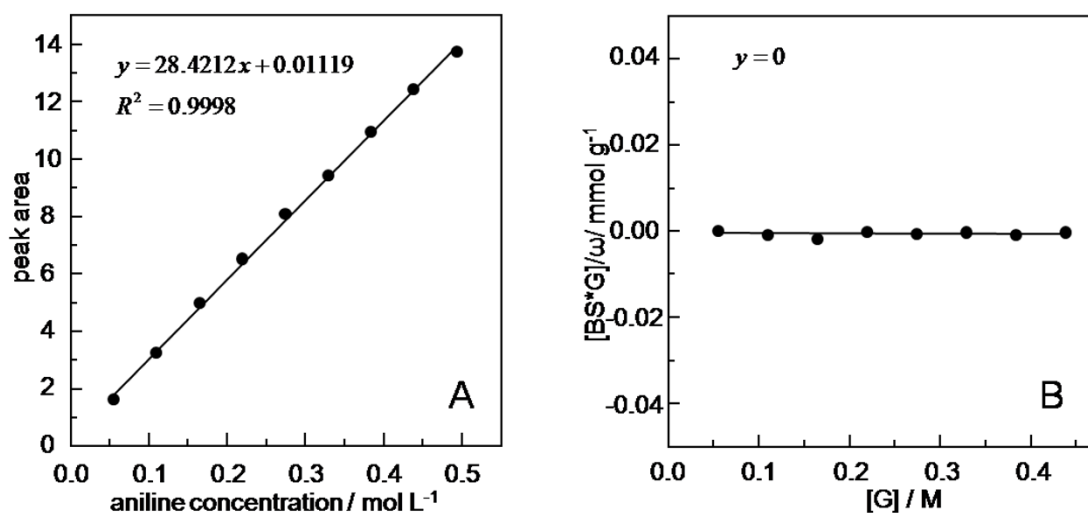

**Figure S36.** Linear curve of GC at various aniline concentration in methanol (A), Binding of host solid JUC-Z2 with aniline guest (B).

#### 14. Binding of host solid JUC-Z2 with N, N-Dimethylformamide guest in different solvent.

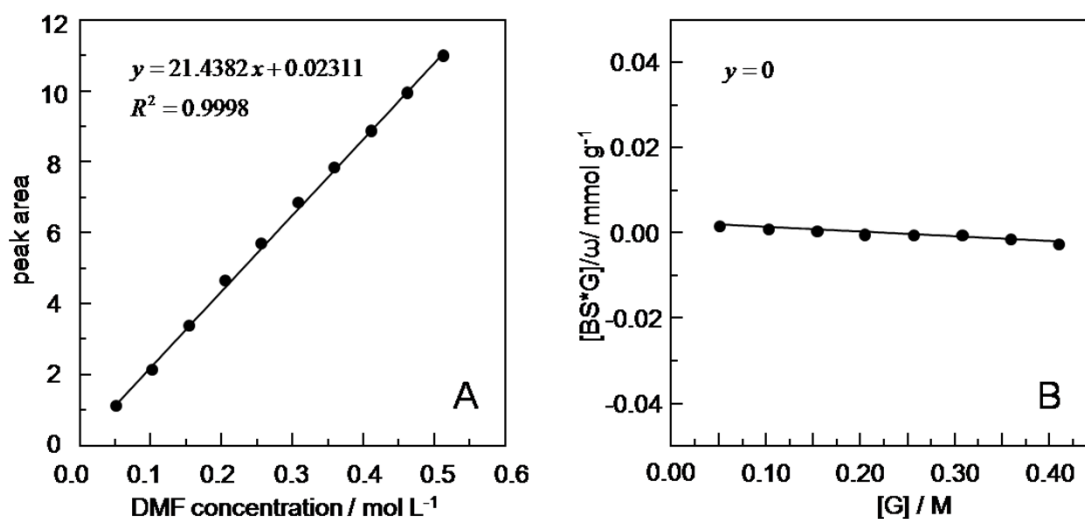

**Figure S37.** Linear curve of GC at various N,N-Dimethylformamide concentration in CCl<sub>4</sub> (A), Binding of host solid JUC-Z2 with N,N-Dimethylformamide guest (B).

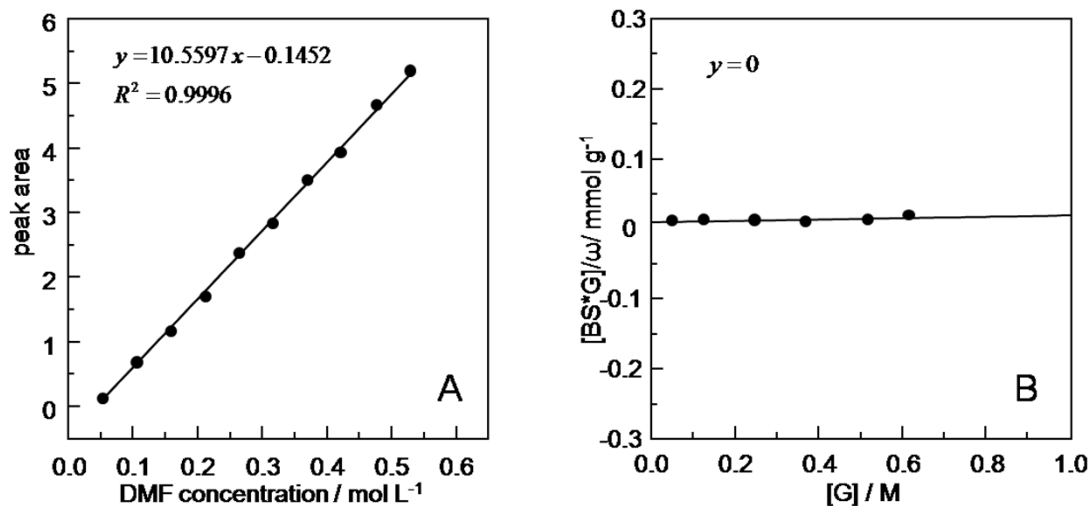

**Figure S38.** Linear curve of GC at various N, N-Dimethylformamide concentration in ethanol (A), Binding of host solid JUC-Z2 with N, N-Dimethylformamide guest (B).

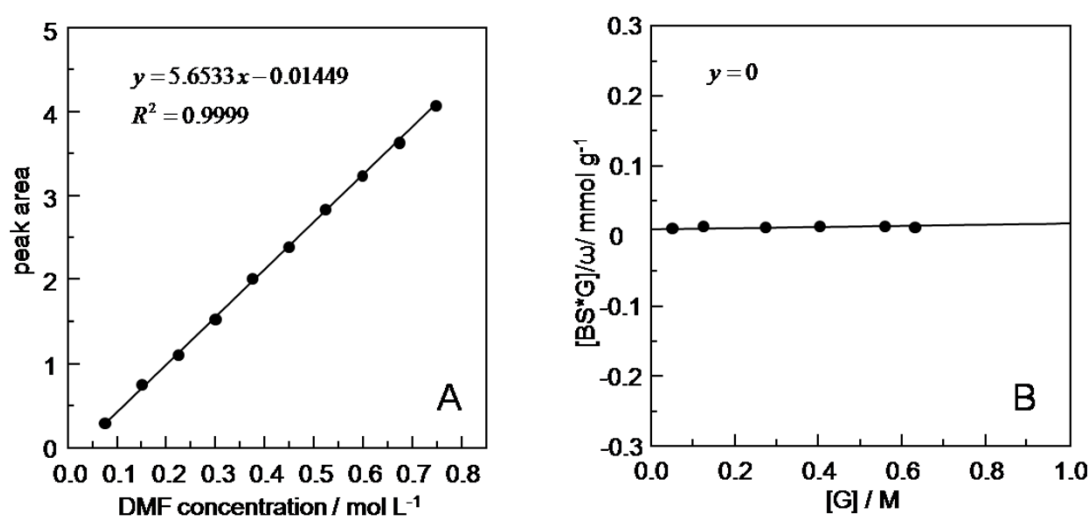

**Figure S39.** Linear curve of GC at various N, N-Dimethylformamide concentration in methanol (A), Binding of host solid JUC-Z2 with N, N-Dimethylformamide guest (B).



15. Binding of host solid JUC-Z2 with N- methyl pyrrolidone guest in different solvent.

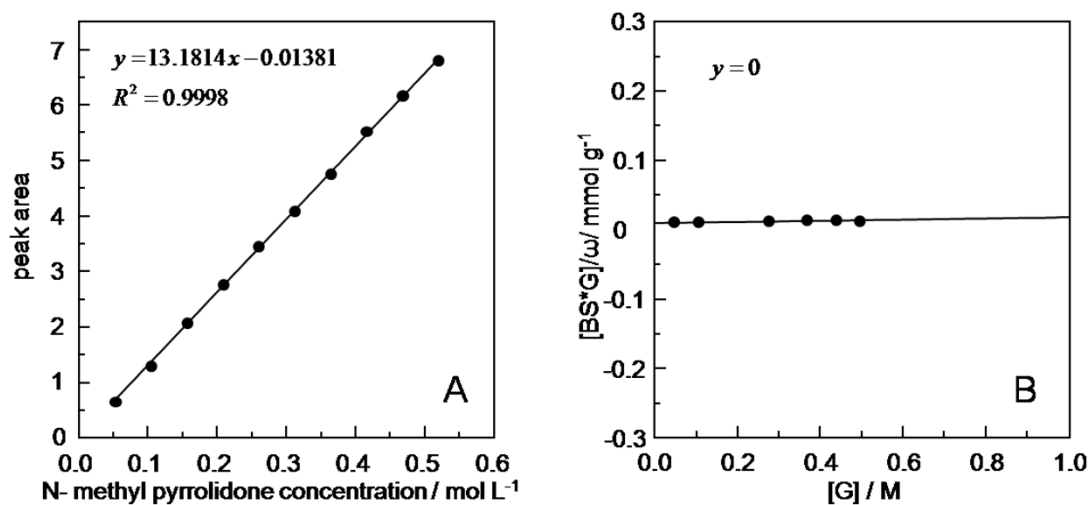

Figure S40. Linear curve of GC at various N- methyl pyrrolidone concentration in CCl<sub>4</sub> (A), Binding of host solid JUC-Z2-SO<sub>3</sub>H with N- methyl pyrrolidone guest (B).

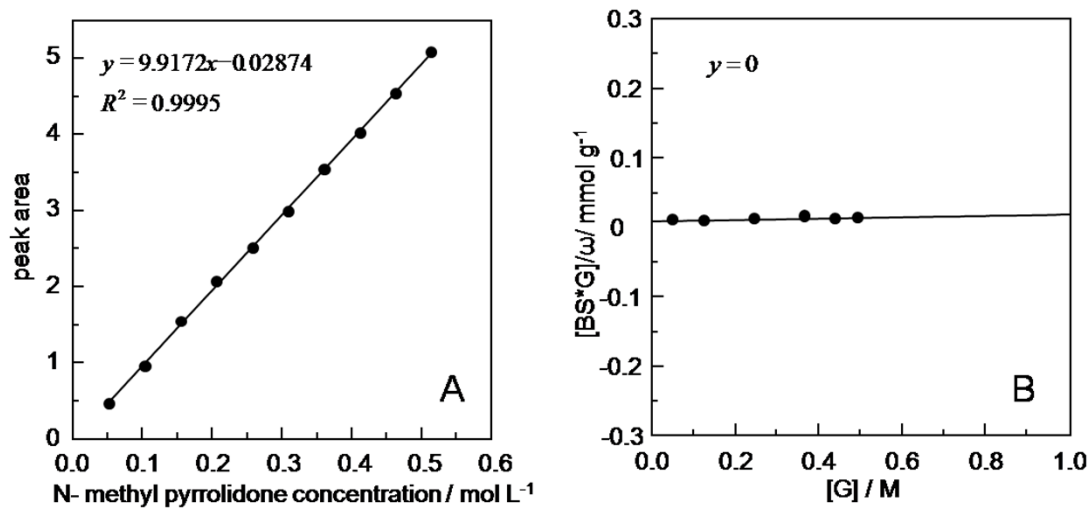

Figure S41. Linear curve of GC at various N- methyl pyrrolidone concentration in ethanol (A), Binding of host solid JUC-Z2-SO<sub>3</sub>H with N- methyl pyrrolidone guest (B).

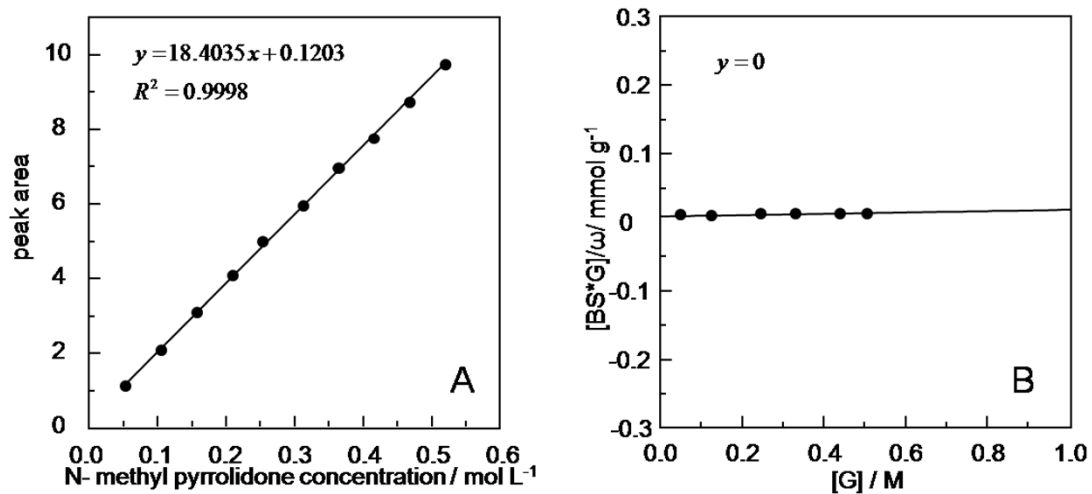

**Figure S42.** Linear curve of GC at various N- methyl pyrrolidone concentration in methanol (A), Binding of host solid JUC-Z2 with N- methyl pyrrolidone guest (B).
